# Supplementary material for: Molecular Genetic Basis of Lab- and Field-Selected Bt Resistance in Pink Bollworm
Source: MDPI journal article supplement (doi:10.3390/insects14020201), 2023-02-17
Supplement: s1 [file s1]

Supporting Information for

**Molecular Genetic Basis of Lab- and Field-Selected Bt Resistance in Pink Bollworm**

Jeffrey A. Fabrick <sup>1,\*</sup>, Xianchun Li <sup>2</sup>, Yves Carrière <sup>2</sup>, and Bruce E. Tabashnik <sup>2</sup>

<sup>1</sup> USDA ARS, U.S. Arid Land Agricultural Research Center, Maricopa, AZ 85138 USA

<sup>2</sup> Department of Entomology, University of Arizona, Tucson, AZ 85721 USA

\* Corresponding author: jeff.fabrick@usda.gov

**SUPPLEMENTARY INFORMATION includes:**

**Supplementary Table S1. *PgCad1* mutations associated with Cry1Ac resistance in pink bollworm from China, India, and the U.S.**

**Supplementary Table S2. *PgABCA2* mutations associated with Cry2Ab resistance in pink bollworm from the U.S. and India.**
